# Supplementary material
Source: publisher site journal article supplement (https://www.dovepress.com/article/349566)
Supplement: Supplementary file 1 [file get_supplementary_file.php]

## Supportive documents for molecular characterization of ESBL and carbapenemase genes

S1 Table 1: Biochemical test results of *Enterobacteriaceae* isolates from blood samples of BSI patients at TASH

| Patient id | Organism isolated       | LF | Indole | Urea | Mannitol | TSI(H2S) | Gas (Glu) | Citrate | Motility | LDC |
|------------|-------------------------|----|--------|------|----------|----------|-----------|---------|----------|-----|
| 7606       | <i>P.retigari</i>       |    | +      | +    | +        |          | +         | +       | +        |     |
| 7131       | <i>K.pneumoniae</i>     | +  |        | +    | +        |          | +         | +       |          | +   |
| 7800       | <i>K.pneumoniae</i>     | +  |        | +    | +        |          | +         | +       |          | +   |
| 7708       | <i>K.pneumoniae</i>     | +  |        | +    | +        |          | +         | +       |          | +   |
| 250        | <i>K.pneumoniae</i>     | +  |        | +    | +        |          | +         | +       |          | +   |
| 380        | <i>E.coli</i>           | +  | +      |      | +        |          | +         |         | +        | +   |
| 546        | <i>Enterobacter spp</i> | +  |        | +    | +        |          | +         | +       | +        |     |
| 626        | <i>K.rihansclris</i>    | +  | +      | +    | +        |          | +         | +       |          | +   |
| 662        | <i>K.pneumoniae</i>     | +  |        | +    | +        |          | +         | +       |          | +   |
| 666        | <i>K.pneumoniae</i>     | +  |        | +    | +        |          | +         | +       |          | +   |
| 693        | <i>K.pneumoniae</i>     | +  |        | +    | +        |          | +         | +       |          | +   |
| 691        | <i>K.pneumoniae</i>     | +  |        | +    | +        |          | +         | +       |          | +   |
| 508        | <i>K.pneumoniae</i>     | +  |        | +    | +        |          | +         | +       |          | +   |
| 728        | <i>E.coli</i>           | +  | +      |      | +        |          | +         |         | +        | +   |
| 643        | <i>K.oxytoca</i>        | +  | +      | +    | +        |          | +         | +       |          | +   |
| 744        | <i>K.pneumoniae</i>     | +  |        | +    | +        |          | +         | +       |          | +   |
| 750        | <i>K.pneumoniae</i>     | +  |        | +    | +        |          | +         | +       |          | +   |
| 780        | <i>K.pneumoniae</i>     | +  |        | +    | +        |          | +         | +       |          | +   |
| 894        | <i>K.oxytoca</i>        | +  | +      | +    | +        |          | +         | +       |          | +   |
| 961        | <i>E.coli</i>           | +  | +      |      | +        |          | +         |         | +        | +   |
| 851        | <i>K.pneumoniae</i>     | +  |        | +    | +        |          | +         | +       |          | +   |
| 974        | <i>K.pneumoniae</i>     | +  |        | +    | +        |          | +         | +       |          | +   |
| 1080       | <i>K.pneumoniae</i>     | +  |        | +    | +        |          | +         | +       |          | +   |
| 1065       | <i>S.marcescens</i>     | +  |        |      | +        |          | +         | +       | +        | +   |
| 25         | <i>K.pneumoniae</i>     | +  |        | +    | +        |          | +         | +       |          | +   |
| 140        | <i>M.morgani</i>        |    | +      | +    |          |          | +         |         | +        |     |
| 141        | <i>K.pneumoniae</i>     | +  |        | +    | +        |          | +         | +       |          | +   |
| 105        | <i>K.pneumoniae</i>     | +  |        | +    | +        |          | +         | +       |          | +   |
| 122        | <i>K.pneumoniae</i>     | +  |        | +    | +        |          | +         | +       |          | +   |
| 90         | <i>M.morgani</i>        |    | +      | +    |          |          | +         |         | +        |     |
| 106        | <i>K.oxytoca</i>        | +  | +      | +    | +        |          | +         | +       |          | +   |
| 157        | <i>E.coli</i>           | +  | +      |      | +        |          | +         |         | +        | +   |
| 181        | <i>K.pneumoniae</i>     | +  |        | +    | +        |          | +         | +       |          | +   |
| 311        | <i>K.pneumoniae</i>     | +  |        | +    | +        |          | +         | +       |          | +   |
| 151        | <i>K.oxytoca</i>        | +  | +      | +    | +        |          | +         | +       |          | +   |
| 291        | <i>K.pneumoniae</i>     | +  |        | +    | +        |          | +         | +       |          | +   |
| 314        | <i>P.mirabilis</i>      |    |        | +    |          | +        | +         | +       | +        |     |
| 523        | <i>K.oxytoca</i>        | +  | +      | +    | +        |          | +         | +       |          | +   |
| 467        | <i>K.oxytoca</i>        | +  | +      | +    | +        |          | +         | +       |          | +   |
| 652        | <i>E.coli</i>           | +  | +      |      | +        |          | +         |         | +        | +   |
| 629        | <i>E.coli</i>           | +  | +      |      | +        |          | +         |         | +        | +   |

|      |                       |   |   |   |   |   |   |   |   |   |
|------|-----------------------|---|---|---|---|---|---|---|---|---|
| 719  | <i>K.pneumoniae</i>   | + |   | + | + |   | + | + |   | + |
| 704  | <i>E.coli</i>         | + | + |   | + |   | + |   | + | + |
| 824  | <i>K.pneumoniae</i>   | + |   | + | + |   | + | + |   | + |
| 861  | <i>K.pneumoniae</i>   | + |   | + | + |   | + | + |   | + |
| 968  | <i>K.pneumoniae</i>   | + |   | + | + |   | + | + |   | + |
| 1028 | <i>K.pneumoniae</i>   | + |   | + | + |   | + | + |   | + |
| 1091 | <i>K.oxytoca</i>      | + | + | + | + |   | + | + |   | + |
| 1100 | <i>K.pneumoniae</i>   | + |   | + | + |   | + | + |   | + |
| 1066 | <i>K.pneumoniae</i>   | + |   | + | + |   | + | + |   | + |
| 1132 | <i>K.pneumoniae</i>   | + |   | + | + |   | + | + |   | + |
| 1194 | <i>K.pneumoniae</i>   | + |   | + | + |   | + | + |   | + |
| 1115 | <i>K.pneumoniae</i>   | + |   | + | + |   | + | + |   | + |
| 1261 | <i>K.pneumoniae</i>   | + |   | + | + |   | + | + |   | + |
| 1248 | <i>P.mirabilis</i>    |   |   | + |   | + | + | + | + |   |
| 1291 | <i>K.pneumoniae</i>   | + |   | + | + |   | + | + |   | + |
| 1340 | <i>K.pneumoniae</i>   | + |   | + | + |   | + | + |   | + |
| 1412 | <i>K.pneumoniae</i>   | + |   | + | + |   | + | + |   | + |
| 1409 | <i>E.coli</i>         | + | + |   | + |   | + |   | + | + |
| 1396 | <i>E.coli</i>         | + | + |   | + |   | + |   | + | + |
| 1424 | <i>E.coli</i>         | + | + |   | + |   | + |   | + | + |
| 1478 | <i>E.coli</i>         | + | + |   | + |   | + |   | + | + |
| 1482 | <i>K.pneumoniae</i>   | + |   | + | + |   | + | + |   | + |
| 1485 | <i>K.oxytoca</i>      | + | + | + | + |   | + | + |   | + |
| 1647 | <i>K.oxytoca</i>      | + | + | + | + |   | + | + |   | + |
| 1681 | <i>K.pneumoniae</i>   | + |   | + | + |   | + | + |   | + |
| 1684 | <i>K.pneumoniae</i>   | + |   | + | + |   | + | + |   | + |
| 1682 | <i>K.pneumoniae</i>   | + |   | + | + |   | + | + |   | + |
| 1716 | <i>M.morgani</i>      |   | + | + |   |   | + |   | + |   |
| 1762 | <i>K.pneumoniae</i>   | + |   | + | + |   | + | + |   | + |
| 1683 | <i>P.retigari</i>     |   | + | + | + |   | + | + | + |   |
| 1686 | <i>K.pneumoniae</i>   | + |   | + | + |   | + | + |   | + |
| 1743 | <i>K.oxytoca</i>      | + | + | + | + |   | + | + |   | + |
| 1829 | <i>E.coli</i>         | + | + |   | + |   | + |   | + | + |
| 1869 | <i>K.oxytoca</i>      | + | + | + | + |   | + | + |   | + |
| 1872 | <i>K.oxytoca</i>      | + | + | + | + |   | + | + |   | + |
| 1961 | <i>K.pneumoniae</i>   | + |   | + | + |   | + | + |   | + |
| 1997 | <i>Salmonella spp</i> |   |   |   | + | + | + | + | + | + |
| 1971 | <i>K.pneumoniae</i>   | + |   | + | + |   | + | + |   | + |
| 1984 | <i>K.pneumoniae</i>   | + |   | + | + |   | + | + |   | + |
| 2199 | <i>K.pneumoniae</i>   | + |   | + | + |   | + | + |   | + |
| 2270 | <i>E.coli</i>         | + | + |   | + |   | + |   | + | + |
| 2336 | <i>E.coli</i>         | + | + |   | + |   | + |   | + | + |
| 2438 | <i>Serratia spp</i>   | + |   |   | + |   |   | + | + | + |
| 2386 | <i>K.pneumoniae</i>   | + |   | + | + |   | + | + |   | + |
| 2400 | <i>K.pneumoniae</i>   | + |   | + | + |   | + | + |   | + |
| 2979 | <i>K.pneumoniae</i>   | + |   | + | + |   | + | + |   | + |

|      |                      |   |   |   |   |  |  |   |   |  |   |   |
|------|----------------------|---|---|---|---|--|--|---|---|--|---|---|
| 2840 | <i>K.pneumoniae</i>  | + |   | + | + |  |  | + | + |  |   | + |
| 2668 | <i>K.oxytoca</i>     | + | + | + | + |  |  | + | + |  |   | + |
| 2686 | <i>K.oxytoca</i>     | + | + | + | + |  |  | + | + |  |   | + |
| 2592 | <i>K.oxytoca</i>     | + | + | + | + |  |  | + | + |  |   | + |
| 2556 | <i>E.coli</i>        | + | + |   | + |  |  | + |   |  | + | + |
| 3326 | <i>E.coli</i>        | + | + |   | + |  |  | + |   |  | + | + |
| 3278 | <i>K.pneumoniae</i>  | + |   | + | + |  |  | + | + |  |   | + |
| 3272 | <i>K.pneumoniae</i>  | + |   | + | + |  |  | + | + |  |   | + |
| 3464 | <i>K.oxytoca</i>     | + | + | + | + |  |  | + | + |  |   | + |
| 3416 | <i>E.coli</i>        | + | + |   | + |  |  | + |   |  | + | + |
| 3524 | <i>K.pneumoniae</i>  | + |   | + | + |  |  | + | + |  |   | + |
| 201  | <i>E.coli</i>        | + | + |   | + |  |  | + |   |  | + | + |
| 3346 | <i>E.coli</i>        | + | + |   | + |  |  | + |   |  | + | + |
| 194  | <i>K.oxytoca</i>     | + | + | + | + |  |  | + | + |  |   | + |
| 438  | <i>K. Pneumoniae</i> | + |   | + | + |  |  | + | + |  |   | + |
| 37   | <i>E.coli</i>        | + | + |   | + |  |  | + |   |  | + | + |
| 85   | <i>K.pneumoniae</i>  | + |   | + | + |  |  | + | + |  |   | + |

Keys: LF-lactose fermenter, TSI-Triple sugar iron, Glu-glucose, LCD-Lysine decarboxylase, H<sub>2</sub>S-hydrogen sulfide.

S2 Table 2: Antimicrobial susceptibility patterns of ESBL producing Enterobacteriaceae from BSI patients at TASH

| Patient id | AM P | GE N | AM K | CT X | CR O | CA Z | CI P | TO B | FE P | CX T | CR X | ME M | SX T | PT Z | AM C | IM I |
|------------|------|------|------|------|------|------|------|------|------|------|------|------|------|------|------|------|
| 7131       | R    | R    | S    | R    | R    | R    | S    | R    | R    | R    | R    | S    | R    | S    | R    | S    |
| 7708       | R    | R    | S    | R    | R    | R    | R    | R    | R    | R    | S    | S    | R    | S    | R    | S    |
| 250        | R    | R    | S    | R    | R    | S    | S    | R    | S    | S    | R    | S    | R    | S    | R    | S    |
| 662        | R    | S    | S    | R    | R    | R    | R    | S    | R    | R    | R    | S    | R    | S    | R    | S    |
| 666        | R    | S    | S    | R    | R    | R    | R    | S    | R    | R    | R    | S    | R    | S    | R    | S    |
| 693        | R    | R    | S    | R    | R    | R    | R    | R    | R    | R    | R    | R    | R    | R    | R    | R    |
| 508        | R    | R    | S    | R    | R    | R    | S    | S    | R    | R    | R    | S    | R    | S    | S    | S    |
| 728        | R    | S    | S    | R    | R    | R    | S    | R    | R    | R    | R    | S    | R    | R    | R    | S    |
| 643        | R    | S    | S    | R    | R    | R    | S    | R    | S    | R    | R    | S    | S    | S    | R    | S    |
| 744        | R    | R    | S    | R    | R    | R    | S    | R    | R    | S    | R    | S    | R    | R    | R    | S    |
| 780        | R    | R    | S    | R    | R    | R    | S    | R    | R    | R    | R    | S    | R    | R    | R    | S    |
| 894        | R    | R    | R    | R    | R    | R    | R    | R    | R    | R    | R    | S    | R    | R    | R    | S    |

|      |   |   |   |   |   |   |   |   |   |   |   |   |   |   |   |   |
|------|---|---|---|---|---|---|---|---|---|---|---|---|---|---|---|---|
| 961  | R | S | R | R | R | R | R | S | R | R | R | S | R | R | R | S |
| 851  | R | R | S | R | R | R | S | S | R | R | R | S | R | S | R | S |
| 974  | R | R | S | R | R | R | S | R | R | R | R | S | R | R | R | S |
| 1080 | R | R | R | R | R | R | R | R | R | R | R | S | R | R | R | S |
| 25   | R | R | S | R | R | R | S | S | S | R | R | S | R | R | R | S |
| 140  | R | R | S | R | R | R | R | R | R | R | R | S | R | S | R | S |
| 141  | R | S | S | R | R | R | R | S | R | R | R | S | R | S | R | S |
| 157  | R | S | S | R | R | R | R | S | S | R | R | S | R | S | R | S |
| 181  | R | S | S | R | R | R | S | S | S | S | R | S | R | S | R | S |
| 311  | R | S | S | R | R | R | S | S | R | R | R | S | R | S | R | S |
| 151  | R | S | S | R | R | R | S | S | R | R | R | S | R | S | R | S |
| 291  | R | R | S | R | R | R | R | R | R | R | R | R | S | R | R | R |
| 314  | R | R | S | R | R | R | R | S | R | R | R | S | R | S | R | S |
| 652  | R | R | S | R | R | R | R | S | R | R | R | S | R | R | R | S |
| 629  | R | S | S | R | R | R | S | S | R | S | R | S | R | S | R | S |
| 719  | R | R | S | R | R | R | R | R | R | R | R | S | R | S | R | S |
| 861  | R | R | S | R | R | R | S | R | R | S | R | S | R | S | R | S |
| 968  | R | R | S | R | R | R | R | R | R | R | R | S | R | R | R | S |
| 1066 | R | S | S | R | R | S | S | S | R | R | R | S | R | S | R | S |
| 1132 | R | R | S | R | R | R | R | R | R | R | R | S | R | R | R | S |
| 1115 | R | R | S | R | R | R | R | R | R | S | R | S | R | R | R | S |
| 1261 | R | R | S | R | R | R | R | R | R | R | R | S | R | R | R | S |
| 1291 | R | R | S | R | R | R | R | S | R | S | R | S | R | R | R | S |
| 1340 | R | R | S | R | R | R | R | R | R | R | R | S | R | R | R | S |
| 1412 | R | R | S | R | R | R | R | R | R | R | R | S | R | R | R | S |
| 1409 | R | R | S | R | R | R | R | S | R | R | R | S | R | R | R | S |
| 1396 | R | R | S | R | R | R | R | S | R | R | R | S | R | R | R | S |
| 1424 | R | R | S | R | R | R | R | R | R | R | R | S | R | S | R | S |
| 1478 | R | R | S | R | R | R | R | S | R | R | R | S | R | R | R | S |
| 1482 | R | R | S | R | R | R | R | R | R | R | R | S | R | S | R | S |
| 1647 | R | S | S | R | R | R | S | S | R | S | R | S | R | S | R | S |
| 1681 | R | R | S | R | R | R | R | R | R | R | R | S | R | R | R | S |
| 1682 | R | R | S | R | R | R | R | R | R | R | R | S | R | R | R | S |
| 1762 | R | R | S | R | R | R | S | R | R | S | R | R | R | R | R | R |
| 1683 | R | S | S | R | S | S | S | S | R | R | R | S | R | S | R | S |
| 1686 | R | R | S | R | R | R | R | S | R | R | R | S | R | S | R | S |
| 1743 | R | R | S | R | R | R | R | R | R | S | R | S | R | R | R | S |
| 1829 | R | S | S | R | R | R | R | S | R | S | R | S | R | R | R | S |
| 1869 | R | R | S | R | R | R | S | R | R | R | R | S | R | R | R | S |
| 1872 | R | R | S | R | S | S | S | S | R | S | R | S | R | S | R | S |
| 1961 | R | S | S | R | R | R | R | S | R | R | R | S | R | S | R | S |
| 1971 | R | S | S | R | R | R | R | S | R | R | R | S | R | S | R | S |
| 1984 | R | R | S | R | R | R | R | R | R | S | R | S | R | S | R | S |
| 2199 | R | R | S | R | R | R | S | S | R | R | R | S | R | S | R | S |
| 2270 | R | S | S | R | R | R | R | S | R | R | R | S | R | R | R | S |
| 2336 | R | S | S | R | R | R | R | S | R | S | R | S | R | S | R | S |

|      |   |   |   |   |   |   |   |   |   |   |   |   |   |   |   |   |
|------|---|---|---|---|---|---|---|---|---|---|---|---|---|---|---|---|
| 2386 | R | R | S | R | R | R | R | S | S | R | R | S | R | S | R | S |
| 2400 | R | R | S | R | R | R | R | S | R | S | R | S | R | R | R | S |
| 2840 | R | S | S | R | R | R | R | S | R | S | R | S | R | S | R | S |
| 2668 | R | R | S | R | R | S | S | S | R | S | R | S | R | S | R | S |
| 2686 | R | S | S | R | R | S | S | S | R | S | R | S | R | S | R | S |
| 2592 | R | R | S | R | R | R | S | S | R | R | R | S | R | S | R | S |
| 3326 | R | R | S | R | R | R | R | S | R | S | R | S | R | S | R | S |
| 3278 | R | R | S | R | R | R | R | R | R | R | R | S | R | S | R | S |
| 3272 | R | S | S | R | R | R | R | R | R | S | R | S | R | S | R | S |
| 3464 | R | R | S | R | R | R | R | S | R | S | R | S | R | S | R | S |
| 3524 | R | R | S | R | R | R | R | R | R | S | R | S | R | R | R | S |
| 85   | R | R | R | R | R | R | S | R | R | R | R | S | R | S | R | S |

Keys: AMP, Ampicillin; Gen, Gentamicin; AMK, Amikacin; CTX, Cefotaxime; CRO, Ceftriaxone; CAZ, Ceftazidime; CIP, Ciprofloxacin, TOB, Tobramycin; FEP, Cefipeme; CXT, Cefoxitin; MEM, Meropenem; IMI, Imipenem; SXT, Trimethoprim/sulphamethoxazol; PTZ, Piperacillin/tazobactam; AMC, Amoxicillin/clavulanic acid; CRX, Cefuroxime; R, resistant and S, susceptible

S3 Table 3: Distribution of ESBL genes among ward type and their MDR patterns

| Patient id | Ward type    | CDT ESBL | CTXM gene | SHV gene | TEM gene | MDR pattern                   |
|------------|--------------|----------|-----------|----------|----------|-------------------------------|
| 7131       | Pediatrics   | Pos      | Pos       | Pos      | Pos      | AM,GM,FEP,FOX,SXT,AUG         |
| 7708       | Pediatrics   | Pos      | Pos       | Neg      | Neg      | AM,GM,CIP,FEP,FOX,SXT,AUG     |
| 250        | Pediatrics   | Pos      | Pos       | Pos      | Pos      | AM,GM,FEP,SXT,AUG             |
| 662        | Medical ward | Pos      | Pos       | Pos      | Pos      | AM,CIP,FEP,FOX,SXT,AUG        |
| 666        | Pediatrics   | Pos      | Pos       | Pos      | Pos      | AM,CIP,FEP,FOX,SXT,AUG        |
| 693        | Pediatrics   | Pos      | Pos       | Neg      | Pos      | AM,GM,CIP,FEP,FOX,MEM,SXT,AUG |
| 508        | ICU          | Pos      | Pos       | Pos      | Pos      | AM,GM,FEP,FOX,SXT             |
| 728        | Medical ward | Pos      | Pos       | Pos      | Pos      | AM,FEP,FOX,SXT,AUG            |
| 643        | Pediatrics   | Pos      | Pos       | Neg      | Neg      | AM,FEP,FOX,AUG                |
| 744        | ICU          | Pos      | Pos       | Pos      | Pos      | AM,GM,FEP,SXT,AUG             |
| 780        | Pediatrics   | Pos      | Pos       | Pos      | Pos      | AM,GM,FEP,SXT,AUG             |
| 894        | Pediatrics   | Pos      | Pos       | Pos      | Pos      | AM,GM,CIP,FEP,FOX,SXT,AUG     |
| 961        | Medical ward | Pos      | Pos       | Pos      | Neg      | AM,CIP,FEP,FOX,SXT,AUG        |
| 851        | Pediatrics   | Pos      | Pos       | Pos      | Pos      | AM,GM,FEP,FOX,SXT,AUG         |
| 974        | Pediatrics   | Pos      | Pos       | Pos      | Pos      | AM,GM,FEP,SXT,AUG             |
| 1080       | Medical ward | Pos      | Pos       | Pos      | Pos      | AM,GM,CIP,FEP,FOX,SXT,AUG     |
| 25         | Pediatrics   | Pos      | Pos       | Pos      | Pos      | AM,GM,FEP,FOX,SXT,AUG         |

|      |              |     |     |     |     |                           |
|------|--------------|-----|-----|-----|-----|---------------------------|
| 140  | Pediatrics   | Pos | Pos | Pos | Pos | AM,GM,CIP,FEP,FOX,SXT,AUG |
| 141  | Medical ward | Pos | Pos | Pos | Pos | AM,CIP,FEP,FOX,SXT,AUG    |
| 157  | Medical ward | Pos | Pos | Neg | Neg | AM,CIP,FOX,SXT,AUG        |
| 181  | Pediatrics   | Pos | Pos | Pos | Pos | AM,FEP,SXT,AUG            |
| 311  | Pediatrics   | Pos | Pos | Neg | Neg | AM,FEP,FOX,SXT,AUG        |
| 151  | Pediatrics   | Pos | Pos | Pos | Pos | AM,FEP,FOX,SXT,AUG        |
| 291  | Medical ward | Pos | Pos | Pos | Pos | AM,GM,CIP,FEP,FOX,MEM,AUG |
| 314  | Medical ward | Pos | Pos | Pos | Neg | AM,GM,CIP,FEP,FOX,SXT,AUG |
| 652  | ICU          | Pos | Pos | Pos | Pos | AM,CIP,FEP,FOX,SXT,AUG    |
| 629  | Pediatrics   | Pos | Pos | Pos | Pos | AM,FEP,SXT,AUG            |
| 719  | ICU          | Pos | Pos | Neg | Pos | AM,GM,CIP,FEP,FOX,SXT,AUG |
| 861  | ICU          | Pos | Pos | Pos | Pos | AM,GM,FEP,SXT,AUG         |
| 968  | ICU          | Pos | Pos | Pos | Pos | AM,GM,CIP,FEP,FOX,SXT,AUG |
| 1066 | ICU          | Pos | Pos | Neg | Pos | AM,FEP,SXT,AUG            |
| 1132 | Medical ward | Pos | Pos | Neg | Pos | AM,GM,CIP,FEP,FOX,SXT,AUG |
| 1115 | Pediatrics   | Pos | Pos | Pos | Pos | AM,GM,CIP,FEP,SXT,AUG     |
| 1261 | Pediatrics   | Pos | Pos | Pos | Pos | AM,GM,CIP,FEP,SXT,AUG     |
| 1291 | ICU          | Pos | Pos | Pos | Pos | AM,GM,CIP,FEP,SXT,AUG     |
| 1340 | Medical ward | Pos | Pos | Pos | Pos | AM,GM,CIP,FEP,FOX,SXT,AUG |
| 1412 | ICU          | Pos | Pos | Neg | Neg | AM,CIP,FEP,FOX,SXT,AUG    |
| 1409 | Pediatrics   | Pos | Pos | Neg | Pos | AM,CIP,FEP,FOX,SXT,AUG    |
| 1396 | Pediatrics   | Pos | Pos | Pos | Pos | AM,CIP,FEP,FOX,SXT,AUG    |
| 1424 | Medical ward | Pos | Pos | Neg | Pos | AM,GM,CIP,FEP,SXT,AUG     |
| 1478 | Pediatrics   | Pos | Pos | Neg | Pos | AM,GM,CIP,FEP,FOX,SXT,AUG |
| 1482 | Pediatrics   | Pos | Pos | Pos | Pos | AM,CIP,FEP,FOX,SXT,AUG    |
| 1647 | Pediatrics   | Pos | Pos | Neg | Neg | AM,FEP,SXT,AUG            |
| 1681 | ICU          | Pos | Pos | Neg | Neg | AM,GM,CIP,FEP,SXT,AUG     |
| 1682 | ICU          | Pos | Pos | Pos | Pos | AM,GM,CIP,FEP,FOX,SXT,AUG |
| 1762 | ICU          | Pos | Pos | Pos | Pos | AM,GM,FEP,SXT,AUG         |
| 1683 | ICU          | Pos | Pos | Neg | Neg | AM,FEP,FOX,SXT,AUG        |
| 1686 | Pediatrics   | Pos | Pos | Pos | Pos | AM,GM,FEP,FOX,SXT,AUG     |
| 1743 | ICU          | Pos | Pos | Pos | Pos | AM,GM,CIP,FEP,SXT,AUG     |
| 1829 | ICU          | Pos | Pos | Neg | Neg | AM,CIP,FEP,SXT,AUG        |
| 1869 | ICU          | Pos | Pos | Pos | Pos | AM,GM,FEP,SXT,AUG         |
| 1872 | ICU          | Pos | Pos | Neg | Neg | AM,GM,FEP,SXT             |
| 1961 | Pediatrics   | Pos | Pos | Pos | Neg | AM,CIP,FEP,SXT,AUG        |
| 1971 | ICU          | Pos | Pos | Pos | Pos | AM,CIP,FEP,SXT,AUG        |
| 1984 | ICU          | Pos | Pos | Pos | Pos | AM,GM,FEP,SXT,AUG         |
| 2199 | ICU          | Pos | Pos | Neg | Pos | AM,GM,FEP,SXT,AUG         |
| 2270 | Pediatrics   | Pos | Pos | Neg | Pos | AM,CIP,FEP,FOX,SXT,AUG    |
| 2336 | Medical ward | Pos | Pos | Pos | Pos | AM,CIP,FEP,SXT            |
| 2386 | Pediatrics   | Pos | Pos | Pos | Pos | AM,FEP,FOX,SXT,AUG        |
| 2400 | ICU          | Pos | Pos | Pos | Pos | AM,GM,FEP,SXT,AUG         |
| 2840 | ICU          | Pos | Pos | Pos | Pos | AM,FEP,SXT                |
| 2668 | Medical ward | Pos | Pos | Pos | Pos | AM,GM,FEP,SXT             |
| 2686 | ICU          | Pos | Pos | Pos | Pos | AM,FEP,SXT                |

|      |              |     |     |     |     |                           |
|------|--------------|-----|-----|-----|-----|---------------------------|
| 2592 | ICU          | Pos | Pos | Pos | Pos | AM,FEP,FOX,SXT,AUG        |
| 3326 | Pediatrics   | Pos | Pos | Neg | Neg | AM,GM,CIP,FEP,SXT         |
| 3278 | ICU          | Pos | Pos | Pos | Pos | AM,GM,FEP,FOX,SXT,AUG     |
| 3272 | Pediatrics   | Pos | Pos | Pos | Pos | AM,CIP,FEP,SXT,AUG        |
| 3464 | ICU          | Pos | Pos | Neg | Neg | AM,FEP,SXT                |
| 3524 | Medical ward | Pos | Pos | Neg | Neg | AM,GM,CIP,FEP,FOX,SXT,AUG |
| 85   | Medical ward | Pos | Pos | Pos | Pos | AM,FEP,FOX,SXT,AUG        |

Keys: AMP, Ampicillin; Gen, Gentamicin; AMK, Amikacin; CTX, Cefotaxime; CRO, Ceftriaxone; CAZ, Ceftazidime; CIP, Ciprofloxacin, TOB, Tobramycin; FEP, Cefipeme; CXT, Cefoxitin; MEM, Meropenem; IMI, Imipenem; SXT, Trimethoprim/sulphamethoxazol; PTZ, Piperacillin/tazobactam; AMC, Amoxicillin/clavulanic acid; CRX, Cefuroxime; CDT, combined disk test; ICU, intensive care unit

S4 Table 4: Distribution of carbapenemase genes among ward type and their MDR patterns

| Patient id | Ward type  | CDT ESBL | mCIM | KPC | NDM | MDR pattern                   |
|------------|------------|----------|------|-----|-----|-------------------------------|
| 7800       | Pediatrics | Neg      | Pos  | Neg | Pos | AM,GM,CIP,FEP,FOX,MEM,AUG     |
| 693        | Pediatrics | Pos      | Pos  | Neg | Pos | AM,GM,CIP,FEP,FOX,MEM,SXT,AUG |
| 691        | Medical    | Neg      | Pos  | Neg | Pos | AM,GM,CIP,FEP,FOX,MEM,SXT,AUG |
| 1065       | Pediatrics | Neg      | Pos  | Neg | Pos | AM,GM,FEP,FOX,MEM,AUG         |
| 90         | Pediatrics | Neg      | Pos  | Neg | Pos | AM,GM,CIP,FEP,FOX,MEM,SXT,AUG |
| 291        | Medical    | Pos      | Pos  | Neg | Pos | AM,GM,CIP,FEP,FOX,MEM,AUG     |
| 704/11     | ICU        | Neg      | Pos  | Neg | Pos | AM,FEP,FOX,MEM,SXT,AUG        |
| 1091/11    | Pediatrics | Neg      | Pos  | Neg | Pos | AM,GM,FEP,FOX,MEM,SXT,AUG     |

Keys: ICU, intensive care unit; CDT, combined disk test; mCIM, modified carbapenem inactivation method; MDR, Multi-drug resistance.
